# Supplementary material
Source: Springer Nature journal article supplement (https://www.springermedizin.de/resource/supplementary/12903_2014_392_MOESM7_ESM.pdf/9516936)
Supplement: MOESM7 [file 9516936]

**Figure 5 – Comparison of dimensions of Patient-Centred Care**

| <b>Dimensions of PCC according to Institute of Medicine</b>                                 | <b>Dimensions of PCC within evidence-based dental literature (3 papers)</b>                                                                      |
|---------------------------------------------------------------------------------------------|--------------------------------------------------------------------------------------------------------------------------------------------------|
| <b>1. Compassion, empathy and responsiveness to needs, values and expressed preferences</b> | <b>1. Empathy, equality, dignity, respect, engagement, trust, courtesy, “listened to”, responsive, individualised care, humanistic approach.</b> |
| <b>2. Co-ordination and integration</b>                                                     | <b>2. -</b>                                                                                                                                      |
| <b>3. Information, communication and education</b>                                          | <b>3. Communication, information.</b>                                                                                                            |
| <b>4. Physical comfort</b>                                                                  | <b>4. -</b>                                                                                                                                      |
| <b>5. Emotional support, relieving fear and anxiety</b>                                     | <b>5. Emotional understanding, understood, non-judgemental, positive outlook, patient contact, relationship.</b>                                 |
| <b>6. Involvement of family and friends</b>                                                 | <b>6. (Consent issues)</b>                                                                                                                       |
